# Supplementary material
Source: PubMed Central journal article supplement (PMC6533448)
Supplement: mmc1.pdf [file mmc1.pdf]

## Use of CT Imaging to Quantify Progression and Response to Treatment in Lymphangioliomyomatosis

*Vissaagan Gopalakrishnan, BS; Jianhua Yao, PhD; Wendy K. Steagall, PhD;  
Nilo A. Avila, MD; Angelo M. Taveira-DaSilva, MD, PhD; Mario Stylianou, PhD;  
Marcus Y. Chen, MD; and Joel Moss, MD, PhD*

CHEST 2019; 155(5):962-971

*Online supplements are not copyedited prior to posting and the author(s) take full responsibility for the accuracy of all data.*

© 2019 AMERICAN COLLEGE OF CHEST PHYSICIANS. Reproduction of this article is prohibited without written permission from the American College of Chest Physicians. See online for more details. DOI: 10.1016/j.chest.2019.01.004

## **e-Appendix 1.**

### **Methods**

#### *Patient Population*

This study was approved by the National Heart, Lung, and Blood Institute Institutional Review Board (NHLBI Protocols 95-H-0186 and 96-H-0100). All patients provided written informed consent. Patients were diagnosed with LAM based on American Thoracic Society and/or European Respiratory Society guidelines<sup>1,2</sup>.

One hundred thirty-five female patients with LAM (age  $49 \pm 10$  years), who visited the NIH Clinical Center in the last 10 years, participated in a cross-sectional study. For each patient, a HRCT scan and corresponding pulmonary function tests (PFT) were obtained (Table 1).

Thirty-five female LAM patients who were treated with sirolimus (age  $45 \pm 10.6$  years at the start of treatment) were studied in a longitudinal study (Table 1). Two hundred seventy-three HRCT scans and corresponding PFT results, an average of  $7.8 \pm 2.0$  studies per patient, were analyzed. On average, patients were studied for  $5.9 \pm 3.2$  years prior to starting treatment and  $4.9 \pm 2.3$  years after initiating treatment. There was no overlap between the two study populations.

Some of the subjects in this study were also studied in previous reports. 36 of the 38 patients studied in Yao et al (2014)<sup>3</sup> and 13 of the 52 patients studied in Yao et al (2012)<sup>4</sup> are included in this study.

#### *Pulmonary Function Testing*

FEV<sub>1</sub> and DL<sub>CO</sub> were measured using a Master Screen PFT (Erich Jaeger, Wuerzburg, Germany) system per American Thoracic Society/European Respiratory Society standards<sup>5,6</sup>. Testing was performed during the same hospital visit as the CT examination.

#### *Radiologic Methods, Lung Segmentation and Cyst Detection*

HRCT scans of the chest (GE Medical Systems, Waukesha, WI; Phillips Healthcare, Amsterdam, Netherlands; Siemens Healthcare, Erlangen, Germany) were performed with the patients in a prone position, as this position minimizes the compression of the lungs by the heart. The radiation dose for obtaining select images of the lungs is over six-fold lower than a standard chest CT with coverage of the chest<sup>7</sup>. The data were obtained prior to the implementation of iterative reconstruction algorithms. Cystic regions and total lung areas were calculated for every slice in a CT examination, yielding a total percent of lung volume occupied by cysts (cyst score) (Figure 1).

#### *Radiologic Methods*

HRCT scans of the chest (GE Medical Systems, Waukesha, WI; Phillips Healthcare, Amsterdam, Netherlands; and Siemens Healthcare, Erlangen, Germany) were performed with the patients in a prone

position during end inspiration at 120–140 kilovolt peak and 118–560 mA, with 1- to 2-second scanning times and 34- to 38-cm field of view<sup>4</sup>. Scans contained 9–13 slices, with slice thickness ranging from 1 to 1.25 mm at 3-cm intervals. Images were reconstructed using a lung kernel (filter) to emphasize the range of pixel values for lung tissues. The prone position minimizes compression of the lungs by the heart. The radiation dose for obtaining select images of the lungs is over six-fold lower than a standard chest CT with coverage of the chest<sup>7</sup>. The data from this study were obtained prior to the implementation of iterative reconstruction algorithms.

#### *Lung Segmentation and Cyst Detection*

A computer-aided diagnostic system segmented the lungs based on region-growing and dynamic programming<sup>4</sup>. Two seed points were defined in the right and left lung, and then expanded to fill the lung using a region-growing algorithm. A histogram-based technique was used to exclude large blood vessels and bronchi. An adaptive threshold was used to define cystic regions. Cystic regions and total lung areas were calculated for every slice in a CT examination, summed separately, and then divided, yielding a total percent of lung volume occupied by cysts (cyst score) (Figure 1).

#### *Texture Analysis*

Texture properties are established mathematical calculations used to quantify the distribution and intensity of pixels in a selected region of an image<sup>8-10</sup>. Twenty-six texture properties, falling under three categories (histogram measures, co-occurrence matrix measures, and run length measures), were calculated for each HRCT (Table 2).

Histogram measures describe the spread of values (mean, variance, standard deviation, etc.) in a figure that plots the frequency of pixels with a certain intensity. There are 6 texture properties in this category (Table 2). Unlike other texture properties, spatial information is not incorporated into the determination of these measures.

Co-occurrence matrix measures are texture properties that calculate how often pairs of pixels with specific intensities occur adjacent to each other (Table 2). There are 9 texture properties in this category, 4 that utilize global measurements, and 5 that utilize separate measurements in the x and y direction (Table 2).

Run length measures describe the continuity of signal by identifying 'runs', which are strings of pixels with the same intensity in a certain orientation. These texture properties can either emphasize the length of the runs, the intensity (gray level) of the runs, or various combinations of the two parameters. There are 11 texture properties in this category (Table 2).

After cysts are segmented, all regions near cysts (<10 mm) and away from cysts (>10 mm) are selected separately (Figure 1). Each region is in turn subdivided into smaller pixel blocks for texture computation. 16 x 16 pixel blocks, composed of an 8 x 8 pixel central region with 4-pixel margin overlap on each side, were used to compute textures<sup>4</sup>. Textures for individual pixel blocks are then averaged

*Online supplements are not copyedited prior to posting and the author(s) take full responsibility for the accuracy of all data.*

across the region and across every slice. The difference in texture (absolute value) between regions near and away from cysts was used to measure of the degradation of lung parenchyma around cysts (Figure 1). For example, the values of the texture property energy at least 10 mm away from cysts 5 years prior to sirolimus treatment were not significantly different from textures at the start of treatment despite decline in lung function and increase in cyst score; however, energy values near cysts varied significantly ( $p=0.004$ ) (Figure 2). All 26 texture properties were examined, and stable areas far from the cysts were found for each. Therefore, texture values at least 10 mm away from cysts served as suitable controls to measure texture changes near cysts. The difference in texture (absolute value) between regions near and away from cysts was used to measure the degradation of lung texture.

#### *Data Analysis and Statistical Methods*

*Cross-sectional Study.* Linear regression of cyst score versus 26 texture properties was computed. Texture properties with significant ( $p<0.05$ ) correlations with cyst score were identified and analyzed further in the longitudinal study.

*Longitudinal Study.* Multiple HRCTs and pulmonary function measurements for each patient were plotted over time. Mixed effects models were used to incorporate within-subject and between-subject variability, as well as repeated measures. Yearly rates of change in cyst score, texture properties, FEV<sub>1</sub>, and DL<sub>CO</sub> were calculated using mixed effects models, adjusting for initial values and sirolimus treatment. Unadjusted, other than the initial value of each outcome, associations of pulmonary function (FEV<sub>1</sub> and DL<sub>CO</sub>) and cyst score against texture properties were also obtained. While factors such as age, body mass index, and race may play a role in texture changes, we did not adjust for them as determining whether these factors play a role in texture changes would probably be best assessed on a much larger cohort of patients. This is an exploratory study with a relatively small number of subjects, which limits our ability to derive meaningful conclusions about multiple factors that could have an effect in a multivariable model. Percent predicted pulmonary function values are already adjusted for age, sex, and body composition.

## References

1. McCormack FX, Gupta N, Finlay GR, et al. Official American Thoracic Society/Japanese Respiratory Society Clinical Practice Guidelines: Lymphangioleiomyomatosis Diagnosis and Management. *Am J Respir Crit Care Med*. 2016;194(6):748-761.
2. Johnson SR, Cordier JF, Lazor R, et al. European Respiratory Society guidelines for the diagnosis and management of lymphangioleiomyomatosis. *Eur Respir J*. 2010;35(1):14-26.
3. Yao J, Taveira-DaSilva AM, Jones AM, Julien-Williams P, Stylianou M, Moss J. Sustained effects of sirolimus on lung function and cystic lung lesions in lymphangioleiomyomatosis. *Am J Respir Crit Care Med*. 2014;190(11):1273-1282.
4. Yao J, Taveira-DaSilva AM, Colby TV, Moss J. CT grading of lung disease in lymphangioleiomyomatosis. *AJR Am J Roentgenol*. 2012;199(4):787-793.
5. Miller MR, Hankinson J, Brusasco V, et al. Standardisation of spirometry. *Eur Respir J*. 2005;26(2):319-338.
6. Macintyre N, Crapo RO, Viegi G, et al. Standardisation of the single-breath determination of carbon monoxide uptake in the lung. *Eur Respir J*. 2005;26(4):720-735.
7. van der Bruggen-Bogaarts BA, Broerse JJ, Lammers JW, van Waes PF, Geleijns J. Radiation exposure in standard and high-resolution chest CT scans. *Chest*. 1995;107(1):113-115.
8. Haidekker MA. *Advanced Biomedical Image Analysis*. Hoboken, N.J.: John Wiley & Sons; 2011.
9. Bankman IN. *Handbook of Medical Imaging: Processing and Analysis*. San Diego, CA: Academic Press; 2000.
10. Haralick RM SK. Textural Features for Image Classification. *IEEE Transactions on Systems, Man, and Cybernetics*. 1973;3(6):610-621.

**e-Table 1.** Listing of means and SE before and after sirolimus treatment for PFTs (FEV<sub>1</sub>, DL<sub>CO</sub>), cyst score, and 18 texture properties of 35 patients using mixed effects models. All analyses were adjusted for the initial values of each outcome variable and time of visit. Texture properties were calculated as the absolute difference in texture between regions near cysts and away from cysts.

|                      | Parameter                   | Pre-treatment |      | Post-treatment |      | P-value  |
|----------------------|-----------------------------|---------------|------|----------------|------|----------|
|                      |                             | Mean          | SE   | Mean           | SE   |          |
|                      | FEV1 (L)                    | 1.68          | 0.05 | 2.15           | 0.06 | <0.00001 |
|                      | FEV1 (%predicted)           | 62.35         | 1.50 | 76.85          | 1.72 | <0.00001 |
|                      | DLCO (mL/min/mm Hg)         | 10.23         | 0.33 | 12.94          | 0.36 | <0.00001 |
|                      | DLCO (%predicted)           | 48.78         | 1.39 | 60.66          | 1.58 | <0.00001 |
|                      | Cyst Score (%)              | 25.43         | 0.79 | 20.78          | 0.97 | 0.00028  |
|                      |                             |               |      |                |      |          |
| Histogram            | Mean                        | 58.54         | 4.33 | 57.35          | 5.34 | 0.86304  |
|                      | Skewness                    | 0.32          | 0.02 | 0.29           | 0.02 | 0.21407  |
|                      | Kurtosis                    | 0.80          | 0.05 | 0.59           | 0.06 | 0.00330  |
| Co-Occurrence Matrix | Energy                      | 17.12         | 1.13 | 12.43          | 1.32 | 0.00238  |
|                      | Inverse Difference          | 0.21          | 0.01 | 0.17           | 0.01 | 0.00617  |
|                      | Entropy                     | 1.16          | 0.06 | 0.92           | 0.07 | 0.00453  |
|                      | Sum Entropy                 | 84.12         | 3.32 | 70.81          | 3.96 | 0.00642  |
|                      | Difference Entropy          | 87.24         | 2.58 | 77.05          | 3.11 | 0.00910  |
|                      | Sum Average                 | 106.55        | 6.74 | 107.72         | 8.96 | 0.92889  |
|                      | Difference Average          | 6.37          | 0.50 | 5.36           | 0.61 | 0.20099  |
| Run Length           | Short Run Emphasis          | 0.13          | 0.01 | 0.10           | 0.01 | 0.00447  |
|                      | Long Run Emphasis           | 4.57          | 0.33 | 3.17           | 0.38 | 0.00115  |
|                      | Gray Level Nonuniformity    | 6.90          | 0.29 | 6.19           | 0.35 | 0.09934  |
|                      | Run Length Nonuniformity    | 16.96         | 1.12 | 13.35          | 1.36 | 0.03775  |
|                      | Run Percentage              | 0.047         | 0.02 | 0.37           | 0.03 | 0.00231  |
|                      | Low Gray Run Emphasis       | 0.015         | 0.01 | 0.12           | 0.01 | 0.04516  |
|                      | Short Run Low Gray Emphasis | 0.02          | 0.00 | 0.03           | 0.00 | 0.05017  |
|                      | Long Run Low Gray Emphasis  | 4.67          | 0.37 | 3.00           | 0.43 | 0.00077  |

**e-Table 2.** Associations of texture properties with FEV<sub>1</sub> in patient visits prior to sirolimus treatment, as well as in all patient visits (including visits when receiving sirolimus treatment), using mixed effects models. The table lists the coefficient estimate for each predictor variable adjusted for initial values of individual outcomes and time of visit.

|                      | Predictor                   | FEV <sub>1</sub>          |        |          |            |       |          |
|----------------------|-----------------------------|---------------------------|--------|----------|------------|-------|----------|
|                      |                             | Pre-treatment visits only |        |          | All visits |       |          |
|                      |                             | Estimate                  | SE     | p-value  | Estimate   | SE    | p-value  |
|                      | Cyst score                  | -0.54                     | 0.10   | <0.00001 | -0.48      | 0.08  | <0.00001 |
| Histogram            | Mean                        | -0.07                     | 0.02   | 0.00637  | -0.07      | 0.02  | 0.00008  |
|                      | Skewness                    | -5.63                     | 5.51   | 0.30847  | -10.43     | 4.34  | 0.01700  |
|                      | Kurtosis                    | -1.82                     | 2.21   | 0.41129  | -5.87      | 1.71  | 0.00070  |
| Co-Occurrence Matrix | Energy                      | -0.32                     | 0.09   | 0.00052  | 0.40       | 0.07  | <0.00001 |
|                      | Inverse Difference          | -32.60                    | 9.98   | 0.00141  | -41.73     | 7.78  | <0.00001 |
|                      | Entropy                     | -5.78                     | 1.69   | 0.00086  | -7.15      | 1.34  | <0.00001 |
|                      | Sum Entropy                 | -0.10                     | 0.03   | 0.00139  | -0.12      | 0.02  | <0.00001 |
|                      | Difference Entropy          | -0.11                     | 0.04   | 0.00321  | -0.15      | 0.03  | <0.00001 |
|                      | Sum Average                 | -0.02                     | 0.01   | 0.07036  | -0.03      | 0.01  | 0.00515  |
|                      | Difference Average          | -0.39                     | 0.20   | 0.05918  | -0.43      | 0.16  | 0.00640  |
| Run Length           | Short Run Emphasis          | -48.93                    | 14.55  | 0.00103  | -63.20     | 11.61 | <0.00001 |
|                      | Long Run Emphasis           | -1.01                     | 0.31   | 0.00135  | -1.38      | 0.25  | <0.00001 |
|                      | Gray Level Nonuniformity    | -0.63                     | 0.34   | 0.06423  | -0.99      | 0.26  | 0.00021  |
|                      | Run Length Nonuniformity    | -0.32                     | 0.09   | 0.00062  | -0.35      | 0.07  | <0.00001 |
|                      | Run Percentage              | -15.36                    | 4.14   | 0.00031  | -18.53     | 3.26  | <0.00001 |
|                      | Low Gray Run Emphasis       | -33.69                    | 9.26   | 0.00040  | -36.72     | 7.36  | <0.00001 |
|                      | Short Run Low Gray Emphasis | 171.67                    | 65.220 | 0.00957  | 132.03     | 47.71 | 0.00612  |
|                      | Long Run Low Gray Emphasis  | -1.022                    | 0.272  | 0.00026  | -1.31      | 0.22  | <0.00001 |

**e-Table 3.** Associations of texture properties with DL<sub>CO</sub> in patient visits prior to sirolimus treatment, as well as in all patient visits (including visits when receiving sirolimus treatment), using mixed effects models. The table lists the coefficient estimate for each predictor variable adjusted for initial values of individual outcomes and time of visit.

|                      | Predictor                   | DL <sub>CO</sub>          |       |         |            |       |          |
|----------------------|-----------------------------|---------------------------|-------|---------|------------|-------|----------|
|                      |                             | Pre-treatment visits only |       |         | All visits |       |          |
|                      |                             | Estimate                  | SE    | p-value | Estimate   | SE    | p-value  |
|                      | Cyst score                  | -0.39                     | 0.10  | 0.00013 | -0.41      | 0.08  | <0.00001 |
| Histogram            | Mean                        | -0.04                     | 0.02  | 0.06568 | -0.05      | 0.01  | 0.00155  |
|                      | Skewness                    | -1.70                     | 4.73  | 0.71984 | -4.59      | 3.52  | 0.19404  |
|                      | Kurtosis                    | 0.21                      | 2.00  | 0.91830 | -3.23      | 1.51  | 0.03407  |
| Co-Occurrence Matrix | Energy                      | -0.24                     | 0.08  | 0.00281 | -0.28      | 0.06  | 0.00002  |
|                      | Inverse Difference          | -24.57                    | 8.83  | 0.00623 | -29.89     | 6.76  | 0.00001  |
|                      | Entropy                     | -4.37                     | 1.50  | 0.00424 | -5.07      | 1.16  | 0.00002  |
|                      | Sum Entropy                 | -0.07                     | 0.03  | 0.00830 | -0.08      | 0.02  | 0.00007  |
|                      | Difference Entropy          | -0.08                     | 0.03  | 0.01669 | -0.10      | 0.03  | 0.00008  |
|                      | Sum Average                 | -0.01                     | 0.01  | 0.20176 | -0.02      | 0.01  | 0.00233  |
|                      | Difference Average          | -0.53                     | 0.17  | 0.00249 | -0.42      | 0.13  | 0.00129  |
| Run Length           | Short Run Emphasis          | -36.73                    | 12.88 | 0.00508 | -44.39     | 10.12 | 0.00002  |
|                      | Long Run Emphasis           | -0.79                     | 0.27  | 0.00445 | -0.95      | 0.22  | 0.00003  |
|                      | Gray Level Nonuniformity    | -0.45                     | 0.29  | 0.12456 | -0.62      | 0.22  | 0.00587  |
|                      | Run Length Nonuniformity    | -0.23                     | 0.08  | 0.00525 | -0.24      | 0.06  | 0.00008  |
|                      | Run Percentage              | -11.76                    | 3.69  | 0.00181 | -13.50     | 2.84  | <0.00001 |
|                      | Low Gray Run Emphasis       | -27.88                    | 8.07  | 0.00075 | -28.62     | 6.12  | <0.00001 |
|                      | Short Run Low Gray Emphasis | 63.58                     | 56.04 | 0.25876 | 57.14      | 39.63 | 0.15070  |
|                      | Long Run Low Gray Emphasis  | -0.82                     | 0.24  | 0.00079 | -0.97      | 0.20  | <0.00001 |



**e-Table 4.** Associations of texture properties with cyst score in patient visits prior to sirolimus treatment, as well as in all patient visits (including visits when receiving sirolimus treatment), using mixed effects models. The table lists the coefficient estimate for each predictor variable adjusted for initial values of individual outcomes and time of visit.

|                      | Predictor                   | Cyst Score                |       |          |            |       |          |
|----------------------|-----------------------------|---------------------------|-------|----------|------------|-------|----------|
|                      |                             | Pre-treatment visits only |       |          | All visits |       |          |
|                      |                             | Estimate                  | SE    | p-value  | Estimate   | SE    | p-value  |
| Histogram            | Mean                        | 0.10                      | 0.01  | <0.00001 | 0.11       | 0.01  | <0.00001 |
|                      | Skewness                    | 9.26                      | 2.89  | 0.00168  | 14.48      | 2.31  | <0.00001 |
|                      | Kurtosis                    | 3.18                      | 1.24  | 0.01144  | 4.41       | 0.92  | <0.00001 |
| Co-Occurrence Matrix | Energy                      | 0.47                      | 0.04  | <0.00001 | 0.49       | 0.04  | <0.00001 |
|                      | Inverse Difference          | 49.53                     | 4.63  | <0.00001 | 55.53      | 3.82  | <0.00001 |
|                      | Entropy                     | 8.83                      | 0.77  | <0.00001 | 9.38       | 0.65  | <0.00001 |
|                      | Sum Entropy                 | 0.16                      | 0.01  | <0.00001 | 0.17       | 0.01  | <0.00001 |
|                      | Difference Entropy          | 0.19                      | 0.02  | <0.00001 | 0.21       | 0.01  | <0.0001  |
|                      | Sum Average                 | -0.01                     | 0.01  | 0.22671  | 0.00       | 0.001 | 0.38374  |
|                      | Difference Average          | 0.51                      | 0.10  | <0.00001 | 0.44       | 0.08  | <0.00001 |
| Run Length           | Short Run Emphasis          | 75.37                     | 6.62  | <0.00001 | 79.76      | 5.74  | <0.00001 |
|                      | Long Run Emphasis           | 1.53                      | 0.14  | <0.00001 | 1.55       | 0.13  | <0.00001 |
|                      | Gray Level Nonuniformity    | 1.26                      | 0.16  | <0.00001 | 1.33       | 0.14  | <0.00001 |
|                      | Run Length Nonuniformity    | 0.42                      | 0.04  | <0.00001 | 0.47       | 0.03  | <0.00001 |
|                      | Run Percentage              | 22.79                     | 1.86  | <0.00001 | 24.11      | 1.57  | <0.00001 |
|                      | Low Gray Run Emphasis       | 49.03                     | 3.86  | <0.00001 | 51.13      | 3.38  | <0.00001 |
|                      | Short Run Low Gray Emphasis | -105.77                   | 33.97 | 0.00228  | -71.69     | 26.12 | 0.00653  |
|                      | Long Run Low Gray Emphasis  | 1.43                      | 0.12  | <0.00001 | 1.49       | 0.11  | <0.00001 |
